# Supplementary material for: Optimized Jasmonic Acid Production by Lasiodiplodia theobromae Reveals Formation of Valuable Plant Secondary Metabolites
Source: PLoS One. 2016 Dec 1;11(12):e0167627. doi: 10.1371/journal.pone.0167627 (PMC5132241; doi:10.1371/journal.pone.0167627)
Supplement: S1 Table — In this table, the raw data of the different experiments are listed. (XLSX) [file pone.0167627.s001.xlsx]

## Sheet: Figure_2
																	Fungus weight at inoculation (t0)
No	Label	Growth time [d]	pH	Mean pH	Tare (filter) [mg]	Weight (filter+biomass) [mg]	Biomass (Δ-weight(t0)) [g/L]	Mean Biomass	JA [mg/L]	Average JA [mg/L]	11-12OH-JA [mg/L]	Average 11-12OHJA [mg/L]	oPDA [mg/L]	OPC4 [mg/L]	Average OPC4 [mg/L]			Weight filter	Weight filter+ biomass	Weight Inoculum+ PDA	Inoculation [g/L]
1	KNO3-100mL-A	1.5	4.31	4.30667	9755.2	9880.2	2.1688	2.9488	0.14	0.113333	0.01	0.01	0	0.01	0.01		Inocuklation 100mL = 5 discs
2	KNO3-100mL-B	1.5	4.25		8545.4	8659.7	1.7408		0.09		0.01		0	0.01			1	9756.8	9858.8	102	1.274
3	KNO3-100mL-C	1.5	4.36		8429.6	8623.8	4.9368		0.11		0.01		0	0			2	8526.9	8590.3	63.4	-0.27
4	KNO3-250mL-A	1.5	4.48	4.28	8474.6	8735.1	1.6256	2.0646	0.2	0.17	0.02	0.015	0	0.01	0.01		3	8435.9	8485.7	49.8	-0.814
5	KNO3-250mL-B	1.5	4.84		8445.1	8749.5	2.5036		0.14		0.01		0	0.01			4	8451.6	8493	41.4	-1.15
6	KNO3-500mL-A	1.5	4.35	4.42	8566.4	8858.3	2.2536	2.0941	0.1	0.105	0.01	0.01	0	0.01	0.01		5	8434.6	8531.9	97.3	1.086
7	KNO3-500mL-B	1.5	4.3		8518.8	8944.6	1.9346		0.11		0.01		0	0.01					Average	70.78	0.0252
8	NH4NO3-250mL-A	1.5	3.65	3.68	9678.6	9840.8	0.824	0.7408	0.1	0.17	0.01	0.01	0	0.01	0.01		Inocuklation 250mL = 10 discs
9	NH4NO3-250mL-B	1.5	3.71		9631.1	9843.2	0.6576		0.24		0.01		0	0.01			6	8523.6	8698.9	175.3	1.223
10	KNO3-100mL-A	3	6.38	6.30667	9762.6	9987.3	6.1568	6.4208	1.2	1.19333	0.32	0.386667	0.01	0.82	0.846667		7	8511.4	8668.5	157.1	0.859
11	KNO3-100mL-B	3	6.28		8536.5	8774.4	6.6848		0.95		0.36		0.01	0.71			8	9682.4	9919.7	237.3	2.463
12	KNO3-100mL-C	3	6.26		8540.3	8680.3	2.7688		1.43		0.48		0.01	1.01			9	9670.2	9791.2	121	0.137
13	KNO3-250mL-A	3	6.51	6.20333	8576.2	9082	6.5316	7.44893	3.96	2.39333	0.79	0.33	0.01	3.99	1.78333		10	9790.8	9996.2	205.4	1.825
14	KNO3-250mL-B	3	6.19		8464.2	9027.5	7.6816		1.62		0.15		0.01	0.71					Average	179.22	1.3014
15	KNO3-250mL-C	3	5.91		8519.3	9105.2	8.1336		1.6		0.05		0.01	0.65			Inocuklation 500mL = 15 discs
16	KNO3-500mL-A	3	6.09	6.18	8532.3	9541.9	7.7666	7.6386	2.5	3	0.71	0.695	0.01	1.59	1.775		11	9658.3	9847.6	189.3	0.0716
17	KNO3-500mL-B	3	6.27		9653.4	10637.4	7.5106		3.5		0.68		0.01	1.96			12	9754.9	10046.9	292	1.0986
18	NH4NO3-250mL-A	3	2.54	2.62667	9639.7	10041.1	4.4436	3.71693	0.24	0.31	1	0.57	0	0.13	0.0566667		13	8122.9	8346.6	223.7	0.4156
19	NH4NO3-250mL-B	3	2.6		9768.2	10169.9	4.4496		0.29		0.4		0	0.03			14	9360.2	9554.9	194.7	0.1256
20	NH4NO3-250mL-C	3	2.74		9668	9960.1	2.2576		0.4		0.31		0	0.01			15	8142.2	8407.2	265	0.8286
21	KNO3-100mL-A	6	8.44	8.33	9737.7	10211.8	16.1328	16.8748	389.21	419.783	5.13	10.9767	0	3	34.1667				Average	232.94	0.780933
22	KNO3-100mL-B	6	8.35		8549.4	8979.9	14.3888		531.37		2.9		0	11.8
23	KNO3-100mL-C	6	8.2		8412	8923.2	17.6168		338.77		24.9		0	87.7
24	KNO3-250mL-A	6	8.21	8.22667	8449.8	9189.6	11.2116	13.7076	1322.82	553.33	178.7	125.8	0	154.9	88.4		JA
25	KNO3-250mL-B	6	8.2		8433.2	9414.6	16.0436		309.8		84.8		0	23.3			Growth time [d]	100 mL	250 mL	500 mL	250 mL-NH4NO3
26	KNO3-250mL-C	6	8.27		8529.2	9401.8	13.8676		796.86		113.9		0	87			0	0	0	0	0
27	KNO3-500mL-A	6	7.96	8.005	8498.7	10620.3	18.8866	18.1816	426.75	479.69	70.8	61.55	0	19.7	32.45		1.5	0.11	0.17	0.105	0.17
28	KNO3-500mL-B	6	8.05		9642.5	11623.1	17.4766		532.63		52.3		0	45.2			3	1.19	2.39	3	0.31
29	NH4NO3-250mL-A	6	2.37	2.62	9686.3	10343.7	9.5636	8.28427	0.07	0.116667	1.11	1.10333	0	5e-05	0.00501667		6	419.78	553.33	479.69	0.12
30	NH4NO3-250mL-B	6	2.86		9736.7	10194.3	5.5676		0.22		1.3		0	0.01			9	403.87	559.37	1269	0.1
31	NH4NO3-250mL-C	6	2.63		9665.6	10330.9	9.7216		0.06		0.9		0	0.005			12	427.23	536.1	912.71	0.35
32	KNO3-100mL-A	9	8.57	8.62333	9362.5	9728.5	11.8088	15.2844	403.87	374.055	57.9	80.8667	0	20.6	19.6
33	KNO3-100mL-B	9	8.71		9394.7	9785.4	12.7968		344.24		64.4		0	18.6			Yp/s	0.0085446	0.0111874	0.02538	7e-06
34	KNO3-100mL-C	9	8.59		9326.7	9754.4	14.2768		237.57		120.3		0	0			Productivity	69.9633	92.2217	141	0.0291667
35	KNO3-250mL-A	9	8.44	8.46333	8093.8	9212	18.7796	16.3529	738.23	559.37	34.7	105.233	0	249.8	98.7
36	KNO3-250mL-B	9	8.49		8112	9210.1	18.3776		321.47		141.4		0	0
37	KNO3-250mL-C	9	8.46		9293.6	10067.9	11.9016		618.41		139.6		0	46.3			11-12OHJA
38	KNO3-500mL-A	9	8.29	8.27333	8120.8	9657.6	13.0386	10.7339	1357.68	1269	221.6	194.4	0	0	34		Growth time [d]	100 mL	250 mL	500 mL	250 mL-NH4NO3
39	KNO3-500mL-B	9	8.26		9770.9	10910.4	9.06559		1356.81		130.8		0	65			0	0	0	0	0
40	KNO3-500mL-C	9	8.27		8147.3	9390	10.0976		1092.51		230.8		0	37			1.5	0.01	0.015	0.01	0.01
41	NH4NO3-250mL-A	9	2.9	2.63333	9257.5	9764.2	6.5496	7.37427	0.13	0.100667	1.36	1.26	0	0.01	0.01		3	0.39	0.33	0.7	0.57
42	NH4NO3-250mL-B	9	2.64		8105.3	8678	7.8696		0.17		1.27		0	0.02			6	11	125.8	61.6	1.1
43	NH4NO3-250mL-C	9	2.36		8090.9	8655.3	7.7036		0.002		1.15		0	0			9	80.9	105.2	194.4	1.26
44	KNO3-100mL-A	12	9.08	9.04333	9353.8	9693.6	10.7608	10.6288	417.08	437.23	94.2	102.633	0	0	0		12	102.6	124.7	148.4	3.08
45	KNO3-100mL-B	12	9.02		9389.3	9722.5	10.4968		314.9		128.7		0	0
46	KNO3-100mL-C	12	9.03		9387.7	9667.6	8.3648		579.71		85		0	0
47	KNO3-250mL-A	12	8.78	8.8	8198	8708.1	6.6176	7.0876	311.9	648.2	97.9	124.667	0	0	0		OPC4
48	KNO3-250mL-B	12	8.87		8239.4	8794.5	7.5176		403.61		166.3		0	0			Growth time [d]	100 mL	250 mL	500 mL	250 mL-NH4NO3
49	KNO3-250mL-C	12	8.62		9310.7	9822.8	6.6576		892.79		109.8		0	263.9			0	0	0	0	0
50	KNO3-250mL-D	12	8.93		8173.8	8228.6	-2.4884										1.5	0.01	0.01	0.01	0.01
51	KNO3-500mL-A	12	8.72	8.74	9647	10725.5	8.4556	8.39527	880.41	880.91	152.5	148.433	0	0	0		3	0.85	1.78	1.78	0.06
52	KNO3-500mL-B	12	8.68		8167.2	9267.3	8.6716		912.71		169.8		0	0			6	34.2	88.4	32.5	0.01
53	KNO3-500mL-C	12	8.66		9276.2	10315	8.0586		849.61		123		0	0			9	19.6	98.7	34	0.01
54	KNO3-500mL-D	12	8.9		8230	8985.7	5.2276										12	0	0	0	0.015
55	NH4NO3-250mL-A	12	3.57	3.0475	8295.4	8940.5	9.3176	7.31827	0.67	0.3455	4.52	3.08	0	0.03	0.015
56	NH4NO3-250mL-B	12	2.79		9814	10221.9	4.5736		0.021		1.64		0	0
57	NH4NO3-250mL-C	12	2.74		9330.4	9796	5.7276
58	NH4NO3-250mL-D	12	3.09		9648.3	10173	6.9096

## Sheet: Table_1
No	Label	Growth time [d]	ICA [mg/L]	Average ICA [mg/L]	Std. deviation ICA [mg/L]	SA [mg/L]	Average SA [mg/L]	Std. deviation SA [mg/L]
32	KNO3-100mL-A	9	211.863	269.254	129.624	0.747127	0.807069	0.0700535
33	KNO3-100mL-B	9	178.232			0.88408
34	KNO3-100mL-C	9	417.666			0.790002
35	KNO3-250mL-A	9	431.542	347.379	78.1988	0.802857	1.07691	0.294878
36	KNO3-250mL-B	9	276.969			1.03893
37	KNO3-250mL-C	9	333.628			1.38893
38	KNO3-500mL-A	9	2612.02	2825.32	276.11	2.42735	4.67112	5.02463
39	KNO3-500mL-B	9	2726.76			10.4267
40	KNO3-500mL-C	9	3137.19			1.15932
41	NH4NO3-250mL-A	9	0.423274	0.188798	0.205894	0.000691321	0.000746371	5.3813e-05
42	NH4NO3-250mL-B	9	0.105591			0.000798855
43	NH4NO3-250mL-C	9	0.0375298			0.000748938

## Sheet: Table_2-5
													JA
	Biomass/Volume relation						V=100mL		V=500mL		V=250mL-NH4NO3		Growth time [d]	100 mL	250 mL	500 mL	250 mL-NH4NO3
	time	V=100mL	V=250mL	V=500mL	V=250mL-NH4NO3	time [d]	Lnxo	time [d]	Lnxo	time [d]	Lnxo		0	0	0	0	0
	0	0.7	0.74	0.78	0.74	1.5	1.08181	1.5	0.71295	1.5	-0.301105		1.5	0.11	0.17	0.105	0.17
	1.5	2.95	2.06	2.04	0.74	3	1.85942	3	2.0334	3	1.31372		3	1.19	2.39	3	0.31
	3	6.42	7.45	7.64	3.72	6	2.82554	6	2.90032	6	2.11384		6	419.78	553.33	479.69	0.12
	6	16.87	16.04	18.18	8.28	U	0.51	u	0.52	U	0.34		9	403.87	559.37	1269	0.1
	9	15.28	11.9	13.03	7.37		V=250mL						12	427.23	536.1	912.71	0.35
	12	10.63	7.37	8.4	7.32	time [d]	Lnxo
						1.5	0.722706						Yp/s	0.0085446	0.0111874	0.02538	7e-06
	Yx/s	0.3234	0.306	0.348	0.1508	3	2.00821						Productivity	69.9633	92.2217	141	0.0291667
	Yp/s					6	2.77509
						U	0.5

## Sheet: Phytohormones_raw data
1	2		5	6	7	8	9	10	11	12	13	14	15	16	17	18	19	20	21	22	23	24	25	26	27	28	29	30	31	32	33	34	35	36	37	41	42	43	44	49	50	51	58	59	60	61	62	63	64
																															Transitions:	141/97	137/93			179/135	160/116			174/130			207/137 (-H2O)			214/62	209/59
		Growth time	Weight	Calibration																														[mg/L]				[mg/L]			[mg/l]			[mg/L]				[mg/l]
		[d]	[g]	SA	DHBA	ICA	RA	IAA	Camalexin	IBA	Corismate	JA	11/12-OH-JA	OPC4	ABA	dnOPDA	OPC6	cisOPDA	JA-ACC	OPC8	SA-Gluc	12-HSO4-JA	JA-Val	JA-IleLeu	12OH-JA-Ile	12COOH-JA-Ile	JA-Phe	12-O-Gluc-JA	ABA-GE	Glucobrassicin	4M-Glucobrassicin	SA-St	SA	SA	S.D.	IAA-St	ICA	ICA	S.D.	IAA	IAA	S.D.	Chorismate	Chorismate	S.D.	JA-St	JA	JA	S.D.
1	KNO3-100mL-A	1.5	1	0.1241	0.004	0.0711	0.0022	0.011	0.0366	0.0043	0.007	0.1042	0.0385	0.005	0.1668	0.0104	0.0023	0.0178	0.0508	0.0034	0.0089	0.001	0.3509	0.2678	0.001	0.001	0.2438	0.001	0.0172	0.0054	0.0008	603000	20600	0.00137641		26900	3450000	11.7642		10.6	0.000179115		2760	0.00326937		156000	442000	0.135956
2	KNO3-100mL-B	1.5	1	0.1241	0.004	0.0711	0.0022	0.011	0.0366	0.0043	0.007	0.1042	0.0385	0.005	0.1668	0.0104	0.0023	0.0178	0.0508	0.0034	0.0089	0.001	0.3509	0.2678	0.001	0.001	0.2438	0.001	0.0172	0.0054	0.0008	562000	18100	0.0012976		25400	2980000	10.7616		0	0		3440	0.00437214		145000	278000	0.0919981
3	KNO3-100mL-C	1.5	1	0.1241	0.004	0.0711	0.0022	0.011	0.0366	0.0043	0.007	0.1042	0.0385	0.005	0.1668	0.0104	0.0023	0.0178	0.0508	0.0034	0.0089	0.001	0.3509	0.2678	0.001	0.001	0.2438	0.001	0.0172	0.0054	0.0008	665000	30500	0.00184789		61700	4550000	6.76426		2610	0.0192279		0	0		158000	367000	0.111458
4	KNO3-250mL-A	1.5	1	0.1241	0.004	0.0711	0.0022	0.011	0.0366	0.0043	0.007	0.1042	0.0385	0.005	0.1668	0.0104	0.0023	0.0178	0.0508	0.0034	0.0089	0.001	0.3509	0.2678	0.001	0.001	0.2438	0.001	0.0172	0.0054	0.0008	615000	280000	0.0183435		62300	5860000	8.62787		2910	0.0212316		4090	0.00475029		156000	650000	0.199936
5	KNO3-250mL-B	1.5	1	0.1241	0.004	0.0711	0.0022	0.011	0.0366	0.0043	0.007	0.1042	0.0385	0.005	0.1668	0.0104	0.0023	0.0178	0.0508	0.0034	0.0089	0.001	0.3509	0.2678	0.001	0.001	0.2438	0.001	0.0172	0.0054	0.0008	814000	19600	0.00097013		40000	7420000	17.0152		3580	0.0406818		5030	0.00441383		175000	524000	0.14368
6	KNO3-500mL-A	1.5	1	0.1241	0.004	0.0711	0.0022	0.011	0.0366	0.0043	0.007	0.1042	0.0385	0.005	0.1668	0.0104	0.0023	0.0178	0.0508	0.0034	0.0089	0.001	0.3509	0.2678	0.001	0.001	0.2438	0.001	0.0172	0.0054	0.0008	531000	225000	0.00284535		49400	6050000	11.2337		5410	0.00829653		4270	0.000957313		106000	216000	0.09778
7	KNO3-500mL-B	1.5	1	0.1241	0.004	0.0711	0.0022	0.011	0.0366	0.0043	0.007	0.1042	0.0385	0.005	0.1668	0.0104	0.0023	0.0178	0.0508	0.0034	0.0089	0.001	0.3509	0.2678	0.001	0.001	0.2438	0.001	0.0172	0.0054	0.0008	627000	10700	9.82237e-05		170000	3500000	1.88848		8770	0.00334989		4370	0.000711194		144000	322000	0.107299
8	NH4NO3-250mL-A	1.5	1	0.1241	0.004	0.0711	0.0022	0.011	0.0366	0.0043	0.007	0.1042	0.0385	0.005	0.1668	0.0104	0.0023	0.0178	0.0508	0.0034	0.0089	0.001	0.3509	0.2678	0.001	0.001	0.2438	0.001	0.0172	0.0054	0.0008	523000	130000	0.00125184		96500	5280000	5.01881		3670	0.00216086		10500	0.00179254		135000	269000	0.0956138
9	NH4NO3-250mL-B	1.5	1	0.1241	0.004	0.0711	0.0022	0.011	0.0366	0.0043	0.007	0.1042	0.0385	0.005	0.1668	0.0104	0.0023	0.0178	0.0508	0.0034	0.0089	0.001	0.3509	0.2678	0.001	0.001	0.2438	0.001	0.0172	0.0054	0.0008	564000	12300	9.76296e-05		65700	4640000	6.47808		2200	0.00169119		7260	0.00102161		120000	598000	0.239123
10	KNO3-100mL-A	3	0.5	0.1241	0.004	0.0711	0.0022	0.011	0.0366	0.0043	0.007	0.1042	0.0385	0.005	0.1668	0.0104	0.0023	0.0178	0.0508	0.0034	0.0089	0.001	0.3509	0.2678	0.001	0.001	0.2438	0.001	0.0172	0.0054	0.0008	748000	255000	0.0274705		37500	5010000	24.5093		1420	0.0344242		2150	0.00410619		143000	1790000	1.20129
11	KNO3-100mL-B	3	0.5	0.1241	0.004	0.0711	0.0022	0.011	0.0366	0.0043	0.007	0.1042	0.0385	0.005	0.1668	0.0104	0.0023	0.0178	0.0508	0.0034	0.0089	0.001	0.3509	0.2678	0.001	0.001	0.2438	0.001	0.0172	0.0054	0.0008	767000	105000	0.0110312		94000	3640000	7.10391		3410	0.0329787		10300	0.0191842		171000	1700000	0.954081
12	KNO3-100mL-C	3	0.5	0.1241	0.004	0.0711	0.0022	0.011	0.0366	0.0043	0.007	0.1042	0.0385	0.005	0.1668	0.0104	0.0023	0.0178	0.0508	0.0034	0.0089	0.001	0.3509	0.2678	0.001	0.001	0.2438	0.001	0.0172	0.0054	0.0008	739000	393000	0.0428525		98600	3350000	6.23292		3390	0.0312558		5270	0.0101875		148000	2200000	1.42657
13	KNO3-250mL-A	3	0.5	0.1241	0.004	0.0711	0.0022	0.011	0.0366	0.0043	0.007	0.1042	0.0385	0.005	0.1668	0.0104	0.0023	0.0178	0.0508	0.0034	0.0089	0.001	0.3509	0.2678	0.001	0.001	0.2438	0.001	0.0172	0.0054	0.0008	818000	19400	0.00191107		49400	24500000	90.9836		2620	0.0482149		5120	0.00894167		99300	4100000	3.96248
14	KNO3-250mL-B	3	0.5	0.1241	0.004	0.0711	0.0022	0.011	0.0366	0.0043	0.007	0.1042	0.0385	0.005	0.1668	0.0104	0.0023	0.0178	0.0508	0.0034	0.0089	0.001	0.3509	0.2678	0.001	0.001	0.2438	0.001	0.0172	0.0054	0.0008	836000	16300	0.00157112		30100	4950000	30.1691		1740	0.0525521		2950	0.00504101		143000	2420000	1.6241
15	KNO3-250mL-C	3	0.5	0.1241	0.004	0.0711	0.0022	0.011	0.0366	0.0043	0.007	0.1042	0.0385	0.005	0.1668	0.0104	0.0023	0.0178	0.0508	0.0034	0.0089	0.001	0.3509	0.2678	0.001	0.001	0.2438	0.001	0.0172	0.0054	0.0008	779000	19900	0.00205847		27800	17500000	115.483		3450	0.112819		5250	0.00962773		146000	2430000	1.5973
16	KNO3-500mL-A	3	0.5	0.1241	0.004	0.0711	0.0022	0.011	0.0366	0.0043	0.007	0.1042	0.0385	0.005	0.1668	0.0104	0.0023	0.0178	0.0508	0.0034	0.0089	0.001	0.3509	0.2678	0.001	0.001	0.2438	0.001	0.0172	0.0054	0.0008	576000	10600	4.63406e-05		25800	9430000	51.407		1080	0.00118922		0	0		107000	2790000	2.50238
17	KNO3-500mL-B	3	0.5	0.1241	0.004	0.0711	0.0022	0.011	0.0366	0.0043	0.007	0.1042	0.0385	0.005	0.1668	0.0104	0.0023	0.0178	0.0508	0.0034	0.0089	0.001	0.3509	0.2678	0.001	0.001	0.2438	0.001	0.0172	0.0054	0.0008	582000	16700	6.80053e-05		70900	17000000	33.7235		3010	0.00113514		8240	0.000594877		109000	3970000	3.4954
18	NH4NO3-250mL-A	3	1	0.1241	0.004	0.0711	0.0022	0.011	0.0366	0.0043	0.007	0.1042	0.0385	0.005	0.1668	0.0104	0.0023	0.0178	0.0508	0.0034	0.0089	0.001	0.3509	0.2678	0.001	0.001	0.2438	0.001	0.0172	0.0054	0.0008	338000	8080	5.35082e-05		0	366000	#DIV/0!		0	#DIV/0!		114000	0.0133841		104000	522000	0.240846
19	NH4NO3-250mL-B	3	1	0.1241	0.004	0.0711	0.0022	0.011	0.0366	0.0043	0.007	0.1042	0.0385	0.005	0.1668	0.0104	0.0023	0.0178	0.0508	0.0034	0.0089	0.001	0.3509	0.2678	0.001	0.001	0.2438	0.001	0.0172	0.0054	0.0008	434000	22600	0.000110424		0	575000	#DIV/0!		0	#DIV/0!		64300	0.0055698		104000	637000	0.293906
20	NH4NO3-250mL-C	3	1	0.1241	0.004	0.0711	0.0022	0.011	0.0366	0.0043	0.007	0.1042	0.0385	0.005	0.1668	0.0104	0.0023	0.0178	0.0508	0.0034	0.0089	0.001	0.3509	0.2678	0.001	0.001	0.2438	0.001	0.0172	0.0054	0.0008	327000	9980	6.14824e-05		8510	1580000	13.0565		2.85	7.61137e-06		56100	0.00612713		85300	717000	0.403341
21	KNO3-100mL-A	6	0.025	0.1241	0.004	0.0711	0.0022	0.011	0.0366	0.0043	0.007	0.1042	0.0385	0.005	0.1668	0.0104	0.0023	0.0178	0.0508	0.0034	0.0089	0.001	0.3509	0.2678	0.001	0.001	0.2438	0.001	0.0172	0.0054	0.0008	113000	9820	0.140053		28700	2780000	355.399		1090	0.690529		0	0		25200	511000	389.209
22	KNO3-100mL-B	6	0.025	0.1241	0.004	0.0711	0.0022	0.011	0.0366	0.0043	0.007	0.1042	0.0385	0.005	0.1668	0.0104	0.0023	0.0178	0.0508	0.0034	0.0089	0.001	0.3509	0.2678	0.001	0.001	0.2438	0.001	0.0172	0.0054	0.0008	81300	15200	0.301308		31300	3150000	369.25		8.94	0.00519315		0	0		19000	526000	531.367
23	KNO3-100mL-C	6	0.025	0.1241	0.004	0.0711	0.0022	0.011	0.0366	0.0043	0.007	0.1042	0.0385	0.005	0.1668	0.0104	0.0023	0.0178	0.0508	0.0034	0.0089	0.001	0.3509	0.2678	0.001	0.001	0.2438	0.001	0.0172	0.0054	0.0008	63300	3430	0.87327		21200	1100000	190.375		0	0		0	0		21700	383000	338.767
24	KNO3-250mL-A	6	0.025	0.1241	0.004	0.0711	0.0022	0.011	0.0366	0.0043	0.007	0.1042	0.0385	0.005	0.1668	0.0104	0.0023	0.0178	0.0508	0.0034	0.0089	0.001	0.3509	0.2678	0.001	0.001	0.2438	0.001	0.0172	0.0054	0.0008	58500	1970	0.542711		19200	5120000	978.414		0	0		0	0		14800	1020000	1322.82
25	KNO3-250mL-B	6	0.025	0.1241	0.004	0.0711	0.0022	0.011	0.0366	0.0043	0.007	0.1042	0.0385	0.005	0.1668	0.0104	0.0023	0.0178	0.0508	0.0034	0.0089	0.001	0.3509	0.2678	0.001	0.001	0.2438	0.001	0.0172	0.0054	0.0008	66200	10100	2.45879		18600	3140000	619.399		0	0		0	0		22800	368000	309.796
26	KNO3-250mL-C	6	0.025	0.1241	0.004	0.0711	0.0022	0.011	0.0366	0.0043	0.007	0.1042	0.0385	0.005	0.1668	0.0104	0.0023	0.0178	0.0508	0.0034	0.0089	0.001	0.3509	0.2678	0.001	0.001	0.2438	0.001	0.0172	0.0054	0.0008	74500	93000	20.118		21200	3790000	655.929		0	0		0	0		18200	730000	769.864
27	KNO3-500mL-A	6	0.025	0.1241	0.004	0.0711	0.0022	0.011	0.0366	0.0043	0.007	0.1042	0.0385	0.005	0.1668	0.0104	0.0023	0.0178	0.0508	0.0034	0.0089	0.001	0.3509	0.2678	0.001	0.001	0.2438	0.001	0.0172	0.0054	0.0008	37500	57200	24.5823		13300	494000	136.279		0	0		0	0		7210	204000	543.072
28	KNO3-500mL-B	6	0.025	0.1241	0.004	0.0711	0.0022	0.011	0.0366	0.0043	0.007	0.1042	0.0385	0.005	0.1668	0.0104	0.0023	0.0178	0.0508	0.0034	0.0089	0.001	0.3509	0.2678	0.001	0.001	0.2438	0.001	0.0172	0.0054	0.0008	49500	39000	12.6975		20400	791000	142.266		0	0		0	0		14500	410000	542.723
29	NH4NO3-250mL-A	6	1	0.1241	0.004	0.0711	0.0022	0.011	0.0366	0.0043	0.007	0.1042	0.0385	0.005	0.1668	0.0104	0.0023	0.0178	0.0508	0.0034	0.0089	0.001	0.3509	0.2678	0.001	0.001	0.2438	0.001	0.0172	0.0054	0.0008	466000	13400	0.00115856		24300	271000	0.784266		0	0		57900	0.0887492		105000	162000	0.0740335
30	NH4NO3-250mL-B	6	1	0.1241	0.004	0.0711	0.0022	0.011	0.0366	0.0043	0.007	0.1042	0.0385	0.005	0.1668	0.0104	0.0023	0.0178	0.0508	0.0034	0.0089	0.001	0.3509	0.2678	0.001	0.001	0.2438	0.001	0.0172	0.0054	0.0008	466000	45400	0.00392526		16200	40300	0.174941		0	0		91300	0.139945		109000	501000	0.220553
31	NH4NO3-250mL-C	6	1	0.1241	0.004	0.0711	0.0022	0.011	0.0366	0.0043	0.007	0.1042	0.0385	0.005	0.1668	0.0104	0.0023	0.0178	0.0508	0.0034	0.0089	0.001	0.3509	0.2678	0.001	0.001	0.2438	0.001	0.0172	0.0054	0.0008	498000	13900	0.00112456		17300	58700	0.238612		0	0		70900	0.101692		113000	141000	0.0598746
32	KNO3-100mL-A	9	0.01	0.1241	0.004	0.0711	0.0022	0.011	0.0366	0.0043	0.007	0.1042	0.0385	0.005	0.1668	0.0104	0.0023	0.0178	0.0508	0.0034	0.0089	0.001	0.3509	0.2678	0.001	0.001	0.2438	0.001	0.0172	0.0054	0.0008	103000	1910	0.747127		22600	522000	211.863		0	0		0	0		24000	202000	403.871
33	KNO3-100mL-B	9	0.01	0.1241	0.004	0.0711	0.0022	0.011	0.0366	0.0043	0.007	0.1042	0.0385	0.005	0.1668	0.0104	0.0023	0.0178	0.0508	0.0034	0.0089	0.001	0.3509	0.2678	0.001	0.001	0.2438	0.001	0.0172	0.0054	0.0008	87500	1920	0.88408		24600	478000	178.232		0	0		0	0		23000	165000	344.238
34	KNO3-100mL-C	9	0.01	0.1241	0.004	0.0711	0.0022	0.011	0.0366	0.0043	0.007	0.1042	0.0385	0.005	0.1668	0.0104	0.0023	0.0178	0.0508	0.0034	0.0089	0.001	0.3509	0.2678	0.001	0.001	0.2438	0.001	0.0172	0.0054	0.0008	86700	1700	0.790002		20600	938000	417.666		0	0		0	0		20400	101000	237.571
35	KNO3-250mL-A	9	0.013	0.1241	0.004	0.0711	0.0022	0.011	0.0366	0.0043	0.007	0.1042	0.0385	0.005	0.1668	0.0104	0.0023	0.0178	0.0508	0.0034	0.0089	0.001	0.3509	0.2678	0.001	0.001	0.2438	0.001	0.0172	0.0054	0.0008	88400	2290	0.802857		22400	1370000	431.542		0	0		0	0		20200	404000	738.225
36	KNO3-250mL-B	9	0.01	0.1241	0.004	0.0711	0.0022	0.011	0.0366	0.0043	0.007	0.1042	0.0385	0.005	0.1668	0.0104	0.0023	0.0178	0.0508	0.0034	0.0089	0.001	0.3509	0.2678	0.001	0.001	0.2438	0.001	0.0172	0.0054	0.0008	79500	2050	1.03893		20500	619000	276.969		0	0		0	0		20300	136000	321.473
37	KNO3-250mL-C	9	0.01	0.1241	0.004	0.0711	0.0022	0.011	0.0366	0.0043	0.007	0.1042	0.0385	0.005	0.1668	0.0104	0.0023	0.0178	0.0508	0.0034	0.0089	0.001	0.3509	0.2678	0.001	0.001	0.2438	0.001	0.0172	0.0054	0.0008	73100	2520	1.38893		21500	782000	333.628		0	0		0	0		18700	241000	618.412
38	KNO3-500mL-A	9	0.01	0.1241	0.004	0.0711	0.0022	0.011	0.0366	0.0043	0.007	0.1042	0.0385	0.005	0.1668	0.0104	0.0023	0.0178	0.0508	0.0034	0.0089	0.001	0.3509	0.2678	0.001	0.001	0.2438	0.001	0.0172	0.0054	0.0008	40500	2440	2.42735		13300	494000	2612.02		0	0		0	0		7210	204000	1357.68
39	KNO3-500mL-B	9	0.01	0.1241	0.004	0.0711	0.0022	0.011	0.0366	0.0043	0.007	0.1042	0.0385	0.005	0.1668	0.0104	0.0023	0.0178	0.0508	0.0034	0.0089	0.001	0.3509	0.2678	0.001	0.001	0.2438	0.001	0.0172	0.0054	0.0008	71100	18400	10.4267		20400	791000	2726.76		0	0		0	0		14500	410000	1356.81
40	KNO3-500mL-C	9	0.01	0.1241	0.004	0.0711	0.0022	0.011	0.0366	0.0043	0.007	0.1042	0.0385	0.005	0.1668	0.0104	0.0023	0.0178	0.0508	0.0034	0.0089	0.001	0.3509	0.2678	0.001	0.001	0.2438	0.001	0.0172	0.0054	0.0008	56300	1620	1.15932		16700	745000	3137.19		0	0		0	0		11200	255000	1092.51
41	NH4NO3-250mL-A	9	1	0.1241	0.004	0.0711	0.0022	0.011	0.0366	0.0043	0.007	0.1042	0.0385	0.005	0.1668	0.0104	0.0023	0.0178	0.0508	0.0034	0.0089	0.001	0.3509	0.2678	0.001	0.001	0.2438	0.001	0.0172	0.0054	0.0008	454000	7790	0.000691321		21100	127000	0.423274		0	0		25700	0.0404342		112000	311000	0.133243
42	NH4NO3-250mL-B	9	1	0.1241	0.004	0.0711	0.0022	0.011	0.0366	0.0043	0.007	0.1042	0.0385	0.005	0.1668	0.0104	0.0023	0.0178	0.0508	0.0034	0.0089	0.001	0.3509	0.2678	0.001	0.001	0.2438	0.001	0.0172	0.0054	0.0008	406000	8050	0.000798855		33100	49700	0.105591		0	0		36900	0.0649191		107000	383000	0.171758
43	NH4NO3-250mL-C	9	1	0.1241	0.004	0.0711	0.0022	0.011	0.0366	0.0043	0.007	0.1042	0.0385	0.005	0.1668	0.0104	0.0023	0.0178	0.0508	0.0034	0.0089	0.001	0.3509	0.2678	0.001	0.001	0.2438	0.001	0.0172	0.0054	0.0008	581000	10800	0.000748938		98000	52300	0.0375298		0	0		8190	0.0100688		127000	6740	0.00254659
44	KNO3-100mL-A	12	0.01	0.1241	0.004	0.0711	0.0022	0.011	0.0366	0.0043	0.007	0.1042	0.0385	0.005	0.1668	0.0104	0.0023	0.0178	0.0508	0.0034	0.0089	0.001	0.3509	0.2678	0.001	0.001	0.2438	0.001	0.0172	0.0054	0.0008	70000	1400	0.805802		21400	667000	2858.95		0	0		0	0		23700	206000	417.082
45	KNO3-100mL-B	12	0.01	0.1241	0.004	0.0711	0.0022	0.011	0.0366	0.0043	0.007	0.1042	0.0385	0.005	0.1668	0.0104	0.0023	0.0178	0.0508	0.0034	0.0089	0.001	0.3509	0.2678	0.001	0.001	0.2438	0.001	0.0172	0.0054	0.0008	82200	1560	0.764629		23500	876000	3419.24		0	0		0	0		22400	147000	314.899
46	KNO3-100mL-C	12	0.01	0.1241	0.004	0.0711	0.0022	0.011	0.0366	0.0043	0.007	0.1042	0.0385	0.005	0.1668	0.0104	0.0023	0.0178	0.0508	0.0034	0.0089	0.001	0.3509	0.2678	0.001	0.001	0.2438	0.001	0.0172	0.0054	0.0008	80900	2020	1.00601		19100	857000	4115.68		0	0		0	0		19700	238000	579.713
47	KNO3-250mL-A	12	0.01	0.1241	0.004	0.0711	0.0022	0.011	0.0366	0.0043	0.007	0.1042	0.0385	0.005	0.1668	0.0104	0.0023	0.0178	0.0508	0.0034	0.0089	0.001	0.3509	0.2678	0.001	0.001	0.2438	0.001	0.0172	0.0054	0.0008	92100	1450	0.634317		23300	413000	1625.88		0	0		0	0		24000	156000	311.9
48	KNO3-250mL-B	12	0.01	0.1241	0.004	0.0711	0.0022	0.011	0.0366	0.0043	0.007	0.1042	0.0385	0.005	0.1668	0.0104	0.0023	0.0178	0.0508	0.0034	0.0089	0.001	0.3509	0.2678	0.001	0.001	0.2438	0.001	0.0172	0.0054	0.0008	88200	2270	1.03694		22400	811000	3320.98		0	0		0	0		21400	180000	403.609
49	KNO3-250mL-C	12	0.01	0.1241	0.004	0.0711	0.0022	0.011	0.0366	0.0043	0.007	0.1042	0.0385	0.005	0.1668	0.0104	0.0023	0.0178	0.0508	0.0034	0.0089	0.001	0.3509	0.2678	0.001	0.001	0.2438	0.001	0.0172	0.0054	0.0008	74600	2150	1.16118		21300	1240000	5339.93		0	0		0	0		20800	387000	892.791
50	KNO3-250mL-D	12
51	KNO3-500mL-A	12	0.01	0.1241	0.004	0.0711	0.0022	0.011	0.0366	0.0043	0.007	0.1042	0.0385	0.005	0.1668	0.0104	0.0023	0.0178	0.0508	0.0034	0.0089	0.001	0.3509	0.2678	0.001	0.001	0.2438	0.001	0.0172	0.0054	0.0008	55900	1230	0.000173829		17600	414000	215.765		0	0		0	0		11500	211000	880.414
52	KNO3-500mL-B	12	0.01	0.1241	0.004	0.0711	0.0022	0.011	0.0366	0.0043	0.007	0.1042	0.0385	0.005	0.1668	0.0104	0.0023	0.0178	0.0508	0.0034	0.0089	0.001	0.3509	0.2678	0.001	0.001	0.2438	0.001	0.0172	0.0054	0.0008	66600	7310	0.000850429		17700	494000	256.004		0	0		0	0		14300	272000	912.715
53	KNO3-500mL-C	12	0.01	0.1241	0.004	0.0711	0.0022	0.011	0.0366	0.0043	0.007	0.1042	0.0385	0.005	0.1668	0.0104	0.0023	0.0178	0.0508	0.0034	0.0089	0.001	0.3509	0.2678	0.001	0.001	0.2438	0.001	0.0172	0.0054	0.0008		9.63	#DIV/0!		9100	496000	499.959		0	0		0	#DIV/0!		17000	301000	849.61
54	KNO3-500mL-D	12
55	NH4NO3-250mL-A	12	1	0.1241	0.004	0.0711	0.0022	0.011	0.0366	0.0043	0.007	0.1042	0.0385	0.005	0.1668	0.0104	0.0023	0.0178	0.0508	0.0034	0.0089	0.001	0.3509	0.2678	0.001	0.001	0.2438	0.001	0.0172	0.0054	0.0008	355000	7460	1.53938e-05		0	23600	#DIV/0!		0	#DIV/0!		0	0		89400	1250000	6.70926
56	NH4NO3-250mL-B	12	1	0.1241	0.004	0.0711	0.0022	0.011	0.0366	0.0043	0.007	0.1042	0.0385	0.005	0.1668	0.0104	0.0023	0.0178	0.0508	0.0034	0.0089	0.001	0.3509	0.2678	0.001	0.001	0.2438	0.001	0.0172	0.0054	0.0008	350000	5070	1.0422e-05		65100	16600	0.0233895		5090	0.000634638		2920	0.000106414		121000	54200	0.214939
57	NH4NO3-250mL-C	12
58	NH4NO3-250mL-D	12
[truncated: 24 more columns]
